# Supplementary material for: Arabidopsis NDL-AGB1 modules Play Role in Abiotic Stress and Hormonal Responses Along with Their Specific Functions
Source: Int J Mol Sci. 2019 Sep 24;20(19):4736. doi: 10.3390/ijms20194736 (PMC6801982; doi:10.3390/ijms20194736)
Supplement: Supplementary file 1 [file ijms-20-04736-s001.zip]

Archive with 8 entries (8 files):
- Supp material/supp fig1.jpg
- Supp material/supp fig2.jpg
- Supp material/supp fig3.jpg
- Supp material/supp fig4.jpg
- Supp material/supp fig5.jpg
- Supp material/supp material Revised Final.docx
- Supp material/supp material Revised Final.pdf
- Supp material/supp table 1.docx
